# Supplementary material for: Ethnobotanical biocultural diversity by rural communities in the Cuatrociénegas Valley, Coahuila; Mexico
Source: PubMed Central journal article supplement (PMC8008621; doi:10.1186/s13002-021-00445-0), 2021-03-29
Supplement: 13002_2021_445_MOESM1_ESM.pdf [file 13002_2021_445_MOESM1_ESM.pdf]

**Estrada E. et al. 2021. Ethnobotanical biocultural diversity by rural communities in the Cuatrociénegas Valley, Coahuila; Mexico. Journal of Ethnobiology and Ethnomedicine.**

**Supplementary Material.** Families, genera, species and their uses in Cuatrociénegas, Coahuila, Mexico. The letter after author name indicates: N = Native, E = Exotic. The collection number belongs to the first author.

| Scientific name                                                        | Common name                  | Uses (system)                                                                            | Part used                                                                   | Method of use                                                              |
|------------------------------------------------------------------------|------------------------------|------------------------------------------------------------------------------------------|-----------------------------------------------------------------------------|----------------------------------------------------------------------------|
| <b>ACANTHACEAE</b>                                                     |                              |                                                                                          |                                                                             |                                                                            |
| <i>Beloperone gutatta</i><br>Brendegee, N, 24957                       | Camarón                      | Ornamental                                                                               | Whole plant<br>for the beauty<br>of its flowers                             | Planted in<br>private and<br>public gardens                                |
| <b>ADOXACEAE</b>                                                       |                              |                                                                                          |                                                                             |                                                                            |
| <i>Sambucus nigra</i> L., N, 24988                                     |                              | Ornamental                                                                               | Whole plant<br>for their showy<br>inflorescences<br>and fragrant<br>flowers | Planted in<br>private and<br>public gardens                                |
|                                                                        |                              | Medicinal<br>(respiratory<br>system), cough                                              | Inflorescences<br>and flowers                                               | Boiled, drink<br>as infusion                                               |
| <b>ALLIACEAE</b>                                                       |                              |                                                                                          |                                                                             |                                                                            |
| <i>Allium cepa</i> L., E, 24956                                        | Cebolla                      | Medicinal<br>(digestive,<br>system), colic,<br>Medicinal<br>(respiratory),<br>runny nose | Stems<br><br>Stems                                                          | Boiled,<br>lapónica1 of<br>infusion<br>Boiled,<br>lapónica1 of<br>infusion |
| <i>Allium sativum</i> L., E, 25039                                     | Ajo                          | Condiment                                                                                | Stems (cloves)                                                              | Macerated, raw<br>or boiled                                                |
| <b>AMARANTHACEAE</b>                                                   |                              |                                                                                          |                                                                             |                                                                            |
| <i>Amaranthus blitoides</i> S.<br>Watson, N, 24968                     | Quelite                      | Food                                                                                     | Leaves and<br>tender stems                                                  | Boiled, cook<br>with eggs                                                  |
| <i>Atriplex canescens</i> (Pursh)<br>Nutt., N, 25040                   | Chamizo,<br>costilla de vaca | Forage                                                                                   | Whole plant                                                                 | Raw                                                                        |
| <i>Celosia crista</i> L., N, 25000                                     | Mano de león                 | Ornamental                                                                               | Whole plant,<br>and by its<br>showy<br>inflorescences                       | Planted in<br>private gardens                                              |
|                                                                        |                              | Medicinal<br>(digestive<br>system), stomach<br>ache                                      | Leaves and<br>inflorescences                                                | Boiled, drink<br>the infusion                                              |
| <i>Dysphania ambrosioides</i> (L.)<br>Mosyakin & Clemants, N,<br>24969 |                              | Food                                                                                     | Leaves                                                                      | Flavor foods                                                               |

|                                          |          |                                                   |        |                                     |
|------------------------------------------|----------|---------------------------------------------------|--------|-------------------------------------|
|                                          |          | Medicinal<br>(Digestive system),<br>antiparasitic | Leaves | Boiled,<br>Zapónica2 of<br>Zapónica |
| <i>Spinacia oleracea</i> L., E,<br>25060 | Espinaca | Food                                              | Leaves | Cook or boiled                      |

---

**ANACARDIACEAE**

|                                   |       |                            |                                                         |                                                                                    |
|-----------------------------------|-------|----------------------------|---------------------------------------------------------|------------------------------------------------------------------------------------|
| <i>Schinus molle</i> L., E, 24955 | Pirúl | Ornamental                 | Whole plant,<br>selected by its<br>perennial<br>foliage | Planted in<br>private and<br>public gardens                                        |
|                                   |       | Religious rites,<br>fright | Leaves                                                  | Shaking and<br>lightly<br>touching the<br>body with the<br>leaves while<br>praying |

---

**APIACEAE**

|                                                       |           |                                                     |        |                               |
|-------------------------------------------------------|-----------|-----------------------------------------------------|--------|-------------------------------|
| <i>Coriandrum sativum</i> L., E,<br>24958             | Cilantro  | Condiment                                           | Leaves | Boiled or raw                 |
|                                                       |           | Medicinal<br>(digestive<br>system), stomach<br>ache | Leaves | Boiled, drink<br>the infusion |
| <i>Cuminum cyminum</i> L., E,<br>25061                | Comino    | Condiment                                           | Seeds  | Boiled with<br>food           |
| <i>Daucus carota</i> L., E                            | Zanahoria | Food                                                | Roots  | Raw or boiled                 |
| <i>Petroselinum crispum</i> (Mill.)<br>Fuss, E, 25062 | Perejil   | Condiment                                           | Leaves | Boiled or raw                 |

---

**APOCYNACEAE**

|                                                     |          |            |                                                          |                                             |
|-----------------------------------------------------|----------|------------|----------------------------------------------------------|---------------------------------------------|
| <i>Nerium oleander</i> L.,E, 25100                  | Laurel   | Ornamental | Whole plant,<br>perennial<br>folage and<br>showy flowers | Planted in<br>private and<br>public gardens |
| <i>Cascabela thevetia</i> (L.)<br>Lippold, E, 24954 |          | Ornamental | Whole plant                                              | Planted in<br>public and<br>private gardens |
| <i>Vinca minor</i> L., E, 25099                     | Teresita | Ornamental | Whole plant,<br>and beautiful<br>flowers                 | Planted in<br>private and<br>public gardens |

---

**ARECACEAE**

|                                                    |       |            |                                                   |                                             |
|----------------------------------------------------|-------|------------|---------------------------------------------------|---------------------------------------------|
| <i>Washingtonia robusta</i> H.<br>Wendl., N, 25001 | Palma | Ornamental | Whole plant,<br>by its<br>perennial big<br>leaves | Planted in<br>private and<br>public gardens |
|----------------------------------------------------|-------|------------|---------------------------------------------------|---------------------------------------------|

---

**ASPARAGACEAE**

|                                             |                       |                                                            |               |                                                                                              |
|---------------------------------------------|-----------------------|------------------------------------------------------------|---------------|----------------------------------------------------------------------------------------------|
| <i>Agave lechuguilla</i> Torr., N,<br>25038 | Lechuguilla,<br>amole | Medicinal<br>(Integumentary<br>system), external<br>wounds | Root          | Milled (pulp)<br>and fresh, as<br>soap or<br>shampoo, as<br>poultice on the<br>affected part |
|                                             |                       | Craft                                                      | Fibers of the | Dried, woven                                                                                 |

|                                                           |                         |                                                   |                                                   |                                                                                                                   |
|-----------------------------------------------------------|-------------------------|---------------------------------------------------|---------------------------------------------------|-------------------------------------------------------------------------------------------------------------------|
| <i>Agave parrasana</i> A. Berger, N, 25098                | Maguey                  | Ornamental                                        | leaves<br>Whole plant, beautiful leaves           | to make sacks<br>Planted in private and public gardens                                                            |
|                                                           |                         | Food                                              | Sap                                               | Raw or cook, drink to accompany meals                                                                             |
|                                                           |                         | Liquor                                            | Sap                                               | Root, fermented                                                                                                   |
|                                                           |                         | Condiment                                         | Leaves                                            | The meat wrapped in maguey leaves is placed in the oven under the ground and left for a full night, barbecue type |
| <i>Agave scabra</i> Ortega, N, 25063                      | Maguey                  | Ornamental                                        | Whole plant, beautiful leaves                     | Planted in private and public gardens                                                                             |
|                                                           |                         | Medicinal (respiratory system), pneumonie         | Leaves (pulp)                                     | Boiled, drink as tea                                                                                              |
|                                                           |                         | Food                                              | Sap                                               | Raw or cook, drink to accompany meals                                                                             |
| <i>Dasyilirion cedrosanum</i> Trel., N, 25002             | Sotol                   | Ornamental                                        | Whole plant, beautiful leaves                     | Planted in private and public gardens                                                                             |
|                                                           |                         | Liquor<br>Fibers                                  | Root<br>Leaves                                    | Fermented<br>Dried, moistened and separated in thin fibers to crafts                                              |
| <i>Sansevieria thyrsiflora</i> (Petagna) Thunb., E, 24970 | Lengua de suegra, guaco | Ornamental                                        | Whole plant, perennial and showy inflorescence    | Planted in private properties and public gardens                                                                  |
|                                                           |                         | Medicinal (integumentary system), dermical wounds | Leaves                                            | Milled (pulp) and fresh, poultice on the affected part                                                            |
|                                                           |                         | Medicinal (Muscular system), muscle pain          | Leaves and roots (pulp)                           | Raw, apply as a poultice                                                                                          |
| <i>Yucca torreyi</i> Shafer, N, 25037                     | Palma                   | Ornamental                                        | Whole plant, its beautiful stem and showy flowers | Planted in private properties and public gardens                                                                  |
|                                                           |                         | Food                                              | Fruits                                            | Raw                                                                                                               |

|                                                                   |                       |                                                     |                                           |                                                                                             |
|-------------------------------------------------------------------|-----------------------|-----------------------------------------------------|-------------------------------------------|---------------------------------------------------------------------------------------------|
| <i>Yucca trecuelana</i> Carriere, N, 24971                        | Palma                 | Ornamental                                          | Whole plant, beautiful flowers and leaves | Planted in private properties and public gardens                                            |
|                                                                   | Palma                 | Food                                                | Flowers                                   | Boiled or cook, mixed with eggs, pepper and onion                                           |
|                                                                   |                       | Food                                                | Fruits                                    | Raw                                                                                         |
| <b>ASTERACEAE</b>                                                 |                       |                                                     |                                           |                                                                                             |
| <i>Ageratina havanensis</i> (Kunth) R.M. King & H. Rob., N, 25036 | Ageratina             | Ornamental                                          | Whole plant, beautiful inflorescences     | Planted in private properties                                                               |
|                                                                   | Estafiate             | Medicinal (digestive system), colic, stomach ache   | Branches, inflorescences, flowers         | Boiled, 4apónica4 of infusion                                                               |
| <i>Artemisia ludoviciana</i> Nutt., N, 25097                      |                       | Medicinal (digestive system), indigestion           | Leaves                                    | Chew and swallow raw leaves                                                                 |
|                                                                   |                       | Medicinal (digestive system), diarrhea              | Leaves                                    | Boiled, drink the infusion                                                                  |
| <i>Calendula officinalis</i> L., E, 24972                         | Cartulina             | Ornamental                                          | Whole plant, showy heads                  | Planted in private properties and public parks                                              |
|                                                                   |                       | Medicinal (respiatory system), cough infections     | Leaves and inflorescences                 | Boiled, drink the infusion                                                                  |
| <i>Chrysactinia mexicana</i> A. Gray, N, 24987                    | Hierba de San Nicolás | Medicinal (reproductive system), sexual strenght    | Leaves                                    | Boiled, drink the 4apónica (this plant is frequently mistaken with <i>Turnera diffusa</i> ) |
| <i>Cynara scolymus</i> L., E, 24959                               | Alcachofa             | Medicinal (Circulatory system), reduce cholesterol  | Leaves                                    | Milled                                                                                      |
|                                                                   |                       | Medicinal (endocrin system), cleanse the liver      | Young leaves and flowers                  | Boiled, drink the infusion                                                                  |
| <i>Flourensia cernua</i> DC., N. 25035                            | Hojasé                | Medicinal (integumentary system), bad smell of feet | Dry leaves                                | Put some leaves inside the shoes                                                            |
|                                                                   |                       | Medicinal (digestive system), laxative              | Leaves                                    | Boiled, 4-5 leaves, infusión, strong drink                                                  |

|                                                              |              |                                                               |                                           |                                                                |
|--------------------------------------------------------------|--------------|---------------------------------------------------------------|-------------------------------------------|----------------------------------------------------------------|
|                                                              |              | Medicinal<br>(digestive system), stomach pain                 | Hojas                                     | Boiled, 4-5, small sip, strong drink                           |
| <i>Gnaphalium semiamplexicaule</i> DC., N, 25064             | Gordolobo    | Medicinal<br>(respiratory system), cough                      | Inflorescences and flowers                | Boiled, drink the infusion                                     |
| <i>Lactuca sativa</i> L., E, 24960                           | Lechuga      | Food                                                          | Leaves                                    | Raw, to prepare salads                                         |
| <i>Machaeranthera pinnatifida</i> (Hook.) Shinners, N, 25065 | Árnica       | Medicinal<br>(integumentary system), external wounds          | Leaves and inflorescences                 | Milled, as poultice on the affected part                       |
|                                                              |              | Medicinal<br>(digestive system) ulcers                        | Whole plant                               | Boil, drink the infusion                                       |
|                                                              |              | Medicinal<br>(integumentary system) disinfect and heal wounds | Whole plant                               | Boils, solution used as poultice                               |
|                                                              |              | Medicinal<br>(integumentary system), pimples                  | Branches                                  | Apply the solution directly in the affected area               |
| <i>Matricaria chamomilla</i> L., E, 25066                    | Manzanilla   | Medicinal<br>(digestive system), stomach ache, colics         | Leaves and flowers                        | Boiled, drink the infusion                                     |
|                                                              |              | Medicinal (ocular system), clean eyes                         | Leaves and flowers                        | Put two warm drops of the 5apónica directly in the eye         |
| <i>Parthenium argentatum</i> A. Gray, N, 25095               | Guayule      | Ornamental                                                    | Whole plant, color and shape of leaves    | Planted in private properties and public parks                 |
| <i>Parthenium incanum</i> Kunth, N, 25094                    | Guayule      | Ornamental                                                    | Whole plant, color of leaves              | Planted in private properties and public parks                 |
|                                                              |              | Medicinal<br>(digestive system), stomach pain                 | Whole plant                               | Milled, boiled, drink the 5apónica, a small sip, strong flavor |
| <i>Tagetes erecta</i> L., N, 24973                           | Cempazuchitl | Ornamental                                                    | Whole plant, showy orange to yellow heads | Planted commonly in public parks                               |

---

#### BIGNONIACEAE

|                                                  |        |            |                                                  |                                                 |
|--------------------------------------------------|--------|------------|--------------------------------------------------|-------------------------------------------------|
| <i>Chilopsis linearis</i> (Cav.) Sweet, N, 24986 | Mimbre | Ornamental | Whole plant, big growth and showy purple flowers | Planted in private properties and public parks, |
|--------------------------------------------------|--------|------------|--------------------------------------------------|-------------------------------------------------|

|                                                              |               |                                        |                                                |                                                                                           |
|--------------------------------------------------------------|---------------|----------------------------------------|------------------------------------------------|-------------------------------------------------------------------------------------------|
| <i>Tecoma stans</i> (L.) Juss. ex Kunth, N, 25034            | San Pedro     | Ornamental                             | Whole plant, showy yellow flowers              | by its beautiful flowers<br>Commonly planted in private gardens, by its beautiful flowers |
| <b>BORAGINACEAE</b>                                          |               |                                        |                                                |                                                                                           |
| <i>Symphytum officinale</i> L., E, 24974                     | Suelda        | Ornamental                             | Whole plant, showy flowers                     | Commonly planted in private gardens, by its beautiful flowers                             |
|                                                              |               | Medicinal (digestive system), diarrhea | Root                                           | Boiled, drkn as tea                                                                       |
| <b>BRASSICACEAE</b>                                          |               |                                        |                                                |                                                                                           |
| <i>Beta vulgaris</i> L., E, 24961                            | Betabel       | Food                                   | Root                                           | Raw or boiled, cut into pieces                                                            |
| <i>Raphanus sativus</i> L., E., 25033                        | Rábano        | Food and condiment                     | Root                                           | Raw, cut into pieces                                                                      |
| <b>CACTACEAE</b>                                             |               |                                        |                                                |                                                                                           |
| <i>Ariocarpus fissuratus</i> (Engelm.) K. Schum., N, 25091   | Chaute        | Ornamental                             | Whole plant, perennial, perennial stems        | Planted in private gardens                                                                |
|                                                              |               | Medicinal (Muscular system), pains     | Stems                                          | Raw pulp, as poultice                                                                     |
| <i>Coryphantha pseudoechinus</i> Boed., N, 25092             | Chilitos      | Ornamental                             | Whole plant, its cylindric shape, perennial    | Planted in private gardens                                                                |
| <i>Cylindropuntia leptocaulis</i> (DC.) F.M. Knuth, N, 24985 | Tasajillo     | Ornamental                             | Whole plant, its long perennial stems          | Planted in private gardens                                                                |
|                                                              |               | Medicinal (Muscular system)            | Stems                                          | Raw, pulp, as poultice                                                                    |
| <i>Cylindropuntia imbricata</i> (Haw.) F.M. Knuth, N         | Cardenche     | Ornamental                             | Whole plant, its long stems                    | Planted in private gardens                                                                |
|                                                              | Manca caballo | Ornamental                             | Whole plant, its sphaerical shape              | Planted in private gardens                                                                |
| <i>Echinocactus horizonthalonius</i> Lem. , N, 25093         |               |                                        | Pulp of stems                                  | Raw                                                                                       |
| <i>Echinocactus platyacanthus</i> Link & Otto, N, 24989      | Biznaga burra | Ornamental                             | Whole plant, its big size and sphaerical shape | Planted in private gardens                                                                |

|                                                                                 |                   |                                                   |                                                                |                                        |
|---------------------------------------------------------------------------------|-------------------|---------------------------------------------------|----------------------------------------------------------------|----------------------------------------|
| <i>Echinocactus texensis</i><br>Hoppfer, N, 25032                               | Manca caballo     | Forage                                            | Stems                                                          | Raw, cut into pieces                   |
|                                                                                 |                   | Food                                              | Stems                                                          | Boiled with sugar, carmalized desserts |
|                                                                                 |                   | Medicinal (integumentary system), external wounds | Pulp of stems                                                  | Raw                                    |
|                                                                                 |                   | Ornamental                                        | Whole plant, its sphaerical shape                              | Planted in private gardens             |
| <i>Echinocereus enneacanthus</i><br>Engelm., N, 25090                           | Pithaya           | Medicinal (integumentary system), external wounds | Pulp of stems                                                  | Raw                                    |
|                                                                                 |                   | Food                                              | Fruits                                                         | Raw, remove the peel and eat           |
|                                                                                 |                   | Food                                              | Fruits                                                         | Mixed with milk to make ice cream      |
|                                                                                 |                   | Medicinal (integumentary system), external wounds | Pulp of stems                                                  | Raw                                    |
| <i>Echinocereus pectinatus</i><br>(Scheidw.) Engelm., N, 25051                  | Pithaya           | Forage                                            | Stems                                                          | Raw                                    |
|                                                                                 |                   | Ornamental                                        | Whole plant, by its cylindrical, and abundant stems            | Planted in private gardens             |
|                                                                                 |                   | Medicinal (integumentary system), external wounds | Pulp of stems                                                  | Raw                                    |
|                                                                                 |                   | Forage                                            | Stems                                                          | Raw                                    |
| <i>Epithelantha micromeris</i><br>(Engelm.) Weber, N, 25067                     | Biznaguita blanca | Ornamental                                        | Whole plant, by the color of its stems, almost thornless       | Planted in private gardens             |
|                                                                                 |                   | Medicinal (integumentary system), wounds          | Pulp of stmes                                                  | Raw                                    |
|                                                                                 |                   | Forage                                            | Stems                                                          | Raw                                    |
|                                                                                 |                   | Ornamental                                        | Whole plant, by the color of its stems, almost thornless       | Planted in private gardens             |
| <i>Ferocactus pilosus</i> (Engelm.)<br>F.A.C. Weber ex Britton & Rose, N, 24990 | Barril de fuego   | Ornamental                                        | Whole plant, by its evident and conspicuous red color prickles | Planted in private gardens             |
|                                                                                 |                   | Forage                                            | Stems                                                          | Raw, cut into pieces                   |
|                                                                                 |                   | Food                                              | Dried fruits called cabuches                                   | Raw or boiled and stored in brine, eat |
|                                                                                 |                   | Forage                                            | Stems                                                          | Raw, cut into pieces                   |

|                                                                        |               |                                                         |                                                                                                                       |                                               |
|------------------------------------------------------------------------|---------------|---------------------------------------------------------|-----------------------------------------------------------------------------------------------------------------------|-----------------------------------------------|
|                                                                        |               | Medicinal<br>(integumentary system), external wounds    | Pulp of stems                                                                                                         | directly<br>Raw                               |
| <i>Lophophora williamsii</i> (Lam. ex Salm-Dyck) J.M. Coult., N, 25030 | Peyote        | Medicinal<br>(osseous and muscular systems), rheumatism | Whole plant into alcohol mixed with <i>Cannabis indica</i> , <i>Rosmarinus officinalis</i> and <i>Ruta graveolens</i> | As poultice in the affected area              |
|                                                                        |               | Ornamental                                              | Whole plant, by its flattened shape                                                                                   | Planted in private gardens                    |
| <i>Opuntia engelmannii</i> Salm-Dyck ex Engelm., N, 25003              | Nopal         | Forage                                                  | Stems                                                                                                                 | Raw, scorched to remove thorns                |
|                                                                        |               | Food                                                    | Fruits                                                                                                                | Raw                                           |
|                                                                        |               | Food                                                    | Fruits                                                                                                                | Boiled, to prepare jam.                       |
|                                                                        |               | Medicinal<br>(endocrin system), diabetes control        | Stems                                                                                                                 | Raw (pulp), cook with olive oil               |
|                                                                        |               | Medicinal<br>(integumentary system), wounds and burns   | Stems (pulp)                                                                                                          | Raw, directly on the affected or wounded area |
|                                                                        |               | Medicinal<br>(digestive system), stomach ache           | Pulp                                                                                                                  | Raw                                           |
| <i>Opuntia ficus-indica</i> (L.) Mill., N, 25070                       | Nopal criollo | Forage                                                  | Stems                                                                                                                 | Raw                                           |
|                                                                        |               | Medicinal<br>(endocrin system), diabetes control        | Stems                                                                                                                 | Raw (pulp), cook with olive oil               |
|                                                                        |               | Ornamental                                              | Whole plant, by its long growth and thornless                                                                         | Planted in private gardens                    |
|                                                                        |               | Medicinal<br>(digestive system), stomach ache           | Pulp                                                                                                                  | Raw                                           |
|                                                                        |               | Medicinal<br>(respiratory system), respiratory diseases | Root                                                                                                                  | Milled and boiled, drink the infusion         |
| <i>Opuntia grahamii</i> Engelm., N, 25004                              | Nopal         | Forage                                                  | Stems                                                                                                                 | Raw, scorched to remove                       |



|                                                   |                |                                                                   |                                                                               |                                                         |
|---------------------------------------------------|----------------|-------------------------------------------------------------------|-------------------------------------------------------------------------------|---------------------------------------------------------|
|                                                   |                | Medicinal (digestive system), stomach ache                        | Pulp                                                                          | thorns<br>Raw                                           |
|                                                   |                | Medicinal (endocrin system), diabetes control                     | Stems                                                                         | Raw (pulp),                                             |
| <i>Opuntia imbricata</i> (Haw.)<br>DC., N. 25029  | Coyonoxtle     | Medicinal (digestive system), stomach ache                        | Fruits                                                                        | Boiled, drink the pulp                                  |
|                                                   |                | Medicinal (endocrin system), diabetes control                     | Stems                                                                         | Raw (pulp),                                             |
| <i>Opuntia phaeacantha</i><br>Engelm., N. 25028   | Nopal rastrero | Forage                                                            | Stems                                                                         | Raw, scorched to remove thorns                          |
|                                                   |                | Medicinal (digestive system), stomach ache                        | Pulp                                                                          | Raw                                                     |
|                                                   |                | Medicinal (endocrin system), diabetes control                     | Stems                                                                         | Raw (pulp), or cook with olive oil                      |
| <b>CANNABACEAE</b>                                |                |                                                                   |                                                                               |                                                         |
| <i>Celtis pallida</i> Torr., N. 25089             | Granjeno       | Food<br>Food                                                      | Fruits<br>Fruits                                                              | Raw<br>Boiled, to make jam                              |
| <b>CAPRIFOLIACEAE</b>                             |                |                                                                   |                                                                               |                                                         |
| <i>Lonicera japonica</i> Thunb., N. 25005         | Madreselva     | Ornamental                                                        | Whole plant, by its showy and the rich aroma of its flowers                   | Planted in private properties                           |
| <b>CARCIACEAE</b>                                 |                |                                                                   |                                                                               |                                                         |
| <i>Carica papaya</i> L., 24962                    | Papaya         | Ornamental<br>Food<br>Medicinal (Digestive system), antiparasitic | Whole plant<br>Fruit<br>Seed                                                  | Planted in private gardens<br>Raw<br>Raw, milled, drink |
| <b>CASUARINACEAE</b>                              |                |                                                                   |                                                                               |                                                         |
| <i>Casuarina cunninghamiana</i><br>Mig., E. 25027 | Casuarina      | Ornamental<br>Construction                                        | Whole plant, by its large growth and perennial foliage<br>Trunks and branches | Planted in public parks<br>Dry wood                     |

---

**CUCURBITACEAE**

|                                                       |          |                                                   |                                                    |                                             |
|-------------------------------------------------------|----------|---------------------------------------------------|----------------------------------------------------|---------------------------------------------|
| <i>Cucurbita pepo</i> L., N, 25068                    | Calabaza | Food                                              | Fruit                                              | Cook, caramelized snacks                    |
|                                                       |          |                                                   | Seeds                                              | Dried and salted, as snacks                 |
| <i>Ibervillea sonora</i> (S. Watson) Greene, N, 24963 | Wereke   | Medicinal (circulatory system), colesterol reduce | Root                                               | Dry, raw, cut into slices, eat two slices   |
| <i>Citrullus lanatus</i> (Thunb.) Matsum. & Nakai, E  | Sandía   | Food                                              | Fruit                                              | Raw, cut into slices                        |
| <i>Cucumis melo</i> L., E, 25026                      | Melón    | Food                                              | Fruit                                              | Raw, cut into slices                        |
|                                                       |          |                                                   | Seeds                                              | Dried, to prepare horchata water            |
| <i>Cupressus arizonica</i> Greene, N, 25006           | Ciprés   | Ornamental                                        | Whole plant, its large size and pereennial foliage | Planted in public parks and private gardens |
|                                                       |          | Fuel                                              | Trunks and branches                                | Dry                                         |
| <i>Cupressus sempervirens</i> L., E, 25007            | Pincel   | Ornamental                                        | Whole plant, its large size and pereennial foliage | Planted in public parks                     |
|                                                       |          | Fuel                                              | Trunks and branches                                | Dry                                         |
| <i>Juniperus flaccida</i> Schltld., N, 25008          | Táscate  | Ornamental                                        | Whole plant, its large size and pereennial foliage | Planted in public parks                     |
|                                                       |          | Fuel                                              | Trunks and branches                                | Dry                                         |

---

**ERICACEAE**

|                                               |          |                                              |        |                               |
|-----------------------------------------------|----------|----------------------------------------------|--------|-------------------------------|
| <i>Arctostaphylos pungens</i> Kunth, N, 25101 | Pingüica | Medicinal (endocrin system), kidney diseases | Leaves | Boiled, ingestion of infusion |
|-----------------------------------------------|----------|----------------------------------------------|--------|-------------------------------|

---

**EUPHORBIACEAE**

|                                                              |            |                                                           |                      |                                       |
|--------------------------------------------------------------|------------|-----------------------------------------------------------|----------------------|---------------------------------------|
| <i>Cnidoscolus aconitifolius</i> (Mill.) I.M. Johnst., 25025 | Chaya      | Ornamental                                                | Whole plant (leaves) | Planted in private gardens            |
|                                                              |            | Medicinal (digestive system)                              | Leaves               | Raw, milled mixed with water, juice   |
| <i>Croton suaveolens</i> Torr., N, 25087                     | Salvia     | Medicinal (circulatory system), improve blood circulation | Leaves and branches  | Boiled, use as a common drink         |
| <i>Euphorbia antisyphilitica</i> Zucc., N, 25088             | Candelilla | Industrial (sap)                                          | Sap                  | Boiled and dried, to obtain crude wax |

|                                        |                                  |                                                                                 |             |                                                                                  |
|----------------------------------------|----------------------------------|---------------------------------------------------------------------------------|-------------|----------------------------------------------------------------------------------|
| <i>Jatropha dioica</i> Sessé, N, 25059 | Sangre de drago, sangre de grado | Medicinal (digestive system), to prevent teeth from falling, strengthening gums | Root        | Biting the root (do not swallow the sucked sap every single morning) for 15 days |
|                                        |                                  | Medicinal (ocular system), clean eyes                                           | Stems       | Apply a drop of sap to the eyes                                                  |
|                                        |                                  | Medicinal (integumentary system), avoid hair loss                               | Sap         | As shampoo, apply directly on the hair                                           |
|                                        |                                  | Medicinal (Integumentary system) skin wound                                     | Sap         | As poultice in the affected area                                                 |
| <i>Ricinus communis</i> L., E, 25057   | Higuerilla                       | Medicinal (digestive system), colic, stomach infections                         | Leaves      | Boiled, ingestion of infusion                                                    |
| <i>Tragia ramosa</i> Torr., N, 25058   | Mala mujer                       | Medicinal (digestive system), stomach ulcers                                    | Leaves      | Boiled, ingestion of infusion                                                    |
|                                        |                                  | Medicinal (Endocrin system), vaginal infections                                 | Whole plant | Boiled, drink the infusion                                                       |

---

#### FABACEAE

|                                                |                  |                                           |                                                      |                                               |
|------------------------------------------------|------------------|-------------------------------------------|------------------------------------------------------|-----------------------------------------------|
| <i>Acacia farnesiana</i> (L.) Willd., N, 24991 | Huizache         | Forage                                    | Pods and seeds                                       | Raw                                           |
|                                                |                  | Medicinal (digestive system), indigestion | Seeds                                                | Toasted                                       |
|                                                |                  | Construction                              | Wood                                                 | Dry, for roofs, fences and columns for cabins |
| <i>Caesalpinia mexicana</i> A. Gray, N, 25102  | Hierba del potro | Ornamental                                | Whole plant, by its showy inflorescences and flowers | Planted in private properties                 |
| <i>Dalea bicolor</i> Willd., N, 24992          | Engorda cabras   | Forage                                    | Whole plant                                          | Raw, mainly for goats                         |
| <i>Eysenhardtia texana</i> Scheele, N, 25056   | Vara dulce       | Forage                                    | Leaves and branches                                  | Raw, domestic livestock                       |
| <i>Phaseolus vulgaris</i> L., N                | Frijol           | Food                                      | Seeds                                                | Cook                                          |
| <i>Prosopis glandulosa</i> Torr., N, 25103     | Mezquite         | Forage                                    | Pods and seeds                                       | Raw, for goats and horses mainly              |
|                                                |                  | Construction                              | Wood                                                 | Dry, for roofs, fences and                    |

|                                                             |                              |                                                                 |                                              |                                                                                    |
|-------------------------------------------------------------|------------------------------|-----------------------------------------------------------------|----------------------------------------------|------------------------------------------------------------------------------------|
|                                                             |                              | Food                                                            | Seeds                                        | columns for cabins<br>Toasted and milled (flour), squeeze and make sweets in molds |
| <i>Vicia faba</i> L., E, 25024                              | Haba                         | Handcrafts<br>Food                                              | Wood<br>Seeds                                | Dry<br>Cook                                                                        |
| <b>FAGACEAE</b>                                             |                              |                                                                 |                                              |                                                                                    |
| <i>Quercus</i> spp., N, 25055                               | Encino                       | Construction                                                    | Wood                                         | Construction of country cottages                                                   |
| <b>FOUQUIERIACEAE</b>                                       |                              |                                                                 |                                              |                                                                                    |
| <i>Fouquieria splendens</i><br>Engelm., N. 25069            | Albarda,<br>ocotillo         | Construction                                                    | Stems                                        | Corrals for domestic livestock                                                     |
| <b>GERANIACEAE</b>                                          |                              |                                                                 |                                              |                                                                                    |
| <i>Pelargonium zonale</i> (L.)<br>L'Hér. ex Aiton, E, 25023 | Geranio                      | Ornamental                                                      | Whole plant,<br>by the polichromatic flowers | Planted in many private gardens                                                    |
| <b>JUGLANDACEAE</b>                                         |                              |                                                                 |                                              |                                                                                    |
| <i>Carya illinoensis</i><br>(Wangerin) K. Koch, N,<br>25054 | Nogal                        | Food                                                            | Fruit                                        | Raw                                                                                |
|                                                             |                              | Medicinal<br>(integumentary system) hair dye                    | Fruit (husk)                                 | Raw, put parts into water, wait for 12 hours and apply directly on the hair        |
| <i>Juglans microcarpa</i> Berl., N                          | Nogalillo                    | Food                                                            | Fruits                                       | Caramelized walnuts                                                                |
|                                                             |                              | Construction                                                    | Wood                                         | Manufacturing household goods                                                      |
| <i>Juglans major</i> (Torr.) Heller,<br>N , 24993           | Nogal de nuez<br>encapsulada | Food                                                            | Fruit                                        | Raw                                                                                |
| <b>LAMIACEAE</b>                                            |                              |                                                                 |                                              |                                                                                    |
| <i>Hedeoma costata</i> Hemsl., N,<br>25104                  | Poleo                        | Condiment                                                       | Leaves                                       | Cook                                                                               |
|                                                             |                              | Medicinal<br>(nervous system), eliminate nervous tension        | Leaves                                       | Boil, drink as tea                                                                 |
|                                                             |                              | Medicinal<br>(digestive system), cure stomach of any discomfort | Leaves                                       | Boil, regrigerate, drink frost preparation                                         |
|                                                             |                              | Medicinal<br>(digestive                                         | Leaves                                       | Boil and drink infusion                                                            |

|                                                            |            |                                                              |                           |                                                        |
|------------------------------------------------------------|------------|--------------------------------------------------------------|---------------------------|--------------------------------------------------------|
| <i>Majorana hortensis</i> Moench, E, 24964                 | Mejorana   | system),<br>constipation<br>Condiment                        | Leaves                    | Mix with food                                          |
|                                                            |            | Condiment                                                    | Leaves                    | To prepare pesto (garlic and olive oil) in restaurants |
|                                                            |            | Medicinal (digestive system),<br>constipation                | Leaves                    | Boil and drink infusion                                |
| <i>Marrubium vulgare</i> L., E, 25086                      | Marrubio   | Medicinal (digestive system),<br>stomacha ache               | Leaves                    | Boil and drink infusion                                |
| <i>Melissa officinalis</i> L., E, 24975                    | Toronjil   | Remove mosquitoes from home                                  | Whole plant               | Scorched dry leaves                                    |
|                                                            |            | Medicinal (digestive system),<br>stomacha ache               | Leaves                    | Boil and drink infusion                                |
| <i>Mentha x piperita</i> L., E, 24976                      | Yerbabuena | Condiment                                                    | Leaves                    | Boil with beaf and soup                                |
|                                                            |            | Medicinal (digestive system), cure stomach of any discomfort |                           | Boil and drink infusion                                |
| <i>Mentha spicata</i> L., E, 25022                         | Yerbabuena | Condiment                                                    | Leaves                    | Boil and drink infusion                                |
|                                                            |            | Medicinal (digestive system), cure stomach of any discomfort |                           |                                                        |
|                                                            |            | Medicinal (nervous system),<br>insomnia                      | Leaves and inflorescences | Boiled, drink the infusión by night                    |
| <i>Ocimum basilicum</i> L., E, 24994                       | Albahaca   | Medicinal (digestive system), bad breath                     | Raw or boiled             | Chew leaves or boiled, drink the infusión and gargle   |
|                                                            |            | Condiment                                                    | Leaves and inflorescences | Boil and drink infusion                                |
|                                                            |            | Food                                                         | Leaves                    | Raw, in salads                                         |
|                                                            |            | Medicinal (auditive system)                                  | Leaves                    | Introduce a leave into the ear                         |
| <i>Poliomintha glabrescens</i> A. Gray ex Hemsl., N, 25053 | Orégano    | Medicinal (digestive system), cure stomach of any discomfort | Leaves and inflorescences | Boil and drink infusion                                |
|                                                            |            | Medicinal (digestive system)                                 | Leaves                    | Boil and drink infusion                                |

|                                               |             |  |                                                                    |                              |                                                                      |
|-----------------------------------------------|-------------|--|--------------------------------------------------------------------|------------------------------|----------------------------------------------------------------------|
|                                               |             |  | system),<br>constipation<br>Condiment                              | Leaves                       | Add to the<br>“menudo” (mix<br>of viscera in<br>broth with<br>spicy) |
| <i>Rosmarinus officinalis</i> L., E,<br>25021 | Romero      |  | Condiment                                                          | Leaves                       | Cook together<br>with the<br>barbecue                                |
|                                               |             |  | Medicinal<br>(digestive<br>system),<br>constipation                | Leaves                       | Boil and drink<br>infusion                                           |
|                                               |             |  | Medicinal<br>(respiratory<br>system), stuffy<br>nose               | Leaves and<br>branches       | Dried, milled,<br>scorch                                             |
|                                               |             |  | Medicinal<br>(endocrin<br>system), pains<br>during<br>menstruation | Leaves and<br>inflorescences | Mixed with<br><i>Cinnamomum<br/>verum</i> (canela)                   |
| <i>Salvia officinalis</i> L., E, 25020        | Salvia real |  | Condiment                                                          | Leaves and<br>inflorescences | Cook together<br>with the food                                       |
|                                               |             |  | Medicinal<br>(reproductive<br>system), vaginal<br>infections       | Whole plant                  | Boiled, drink<br>as tea                                              |
|                                               |             |  | Medicinal<br>(Circulatory<br>system), anemia                       | Leaves and<br>branches       | Take on an<br>empty<br>stomach, drink<br>as tea for a<br>month       |
| <i>Thymus vulgaris</i> L., E, 24965           | Tomillo     |  | Condiment                                                          | Leaves and<br>flowers        | Add to the food<br>when it is<br>cooking                             |
|                                               |             |  | Medicinal<br>(digestive<br>system),<br>constipation                | Leaves and<br>stems          | Dry, boil and<br>drink infusion                                      |

---

#### LAURACEAE

|                                                |          |  |                                                         |        |                                                    |
|------------------------------------------------|----------|--|---------------------------------------------------------|--------|----------------------------------------------------|
| <i>Cinnamomum verum</i> J. Presl.,<br>E, 25009 | Canela   |  | Condiment                                               | Bark   | Add to oatmeal<br>gruel together<br>with honey bee |
| <i>Litsea pringlei</i> Bartlett, N,<br>24995   | Laurel   |  | Medicinal<br>(digestive<br>system), stomach<br>pain     | Leaves | Dry, but<br>boiled, drink<br>the infusion          |
|                                                |          |  | Medicinal<br>(digestive<br>system), inflamed<br>stomach | Leaves | Boiled, drink<br>the infusion                      |
| <i>Persea americana</i> Mill., N,              | Aguacate |  | Food                                                    | Fruit  | Raw, pulp                                          |

24978

*Persea americana* Mill. var  
*drymifolia* (Schltdl. & Cham.)  
S. F. Blake, N, 24977

Aguacate criollo

Medicinal  
(digestive  
system),  
antiparasitic

Fruit peel

Raw

**LILIACEAE**

*Asparagus officinalis* L., E,  
25010

Aspárago

Ornamental

Whole plant

Planted in  
private gardens**LYTHRACEAE**

*Punica granatum* L., E, 24979

Granada

Medicinal  
(integumentary  
system), external  
wounds

Peel

Raw, rub the  
affected area

Food  
Food

Fruit  
Fruit

Raw  
Beverage,  
juice, raw

Food

Fruit

Liquor,  
fermented

Food

Fruit

Boiled, to  
make jam**MALVACEAE**

*Gossypium hirsutum* L., N,  
24996

Algodón

Ornamental

Whole plant,  
by its beautiful  
foliage and  
flower

Planted in  
private gardens

Fibers

Fruit

Raw fibers,  
dried and open  
fruits

*Hibiscus rosa-sinensis* L., E,  
24966

Hibisco

Ornamental

Whole plant,  
its beautiful  
leaves and  
showy flowers

Planted in  
private gardens

*Hibiscus syriacus* L., E, 25011

Rosa de Siria

Ornamental

Whole plant,  
its beautiful  
leaves and  
showy flowers

Planted in  
private gardens**MELIACEAE**

*Melia azedarach* L., 24967

Canelón lila

Ornamental

Whole plant

Planted in  
public parks  
and private  
gardens

Fuel

Trunks and  
branches

Dry

**MONIMIACEAE**

*Peumus boldus*, E, 25019

Boldo

Ornamental

Whole plant,  
by its flowers  
and leaves

Planted in  
private gardens

Medicinal  
(digestive  
system),  
constipation,  
flatulences

Leaves

Boiled,  
ingestion of  
infusion

|  |  |  |                                                      |              |                         |
|--|--|--|------------------------------------------------------|--------------|-------------------------|
|  |  |  | Medicinal<br>(endocrin<br>system),<br>detoxify liver | Dried leaves | Boiled, drink<br>as tea |
|--|--|--|------------------------------------------------------|--------------|-------------------------|

---

**MORACEAE**

|                                              |         |            |  |                                               |                                                      |
|----------------------------------------------|---------|------------|--|-----------------------------------------------|------------------------------------------------------|
| <i>Ficus carica</i> L., E, 25012             | Higuera | Ornamental |  | Whole plant,<br>by its<br>perennial<br>leaves | Planted in<br>private gardens                        |
|                                              |         | Food       |  | Infrutescences<br>(pseudo fruits)             | Raw                                                  |
| <i>Morus celtidifolia</i> Kunth, N,<br>25085 | Mora    | Ornamental |  | Whole plant,<br>by its abundant<br>foilage    | Planted in<br>private gardens<br>and public<br>parks |
|                                              |         | Food       |  | Fruit                                         | Raw                                                  |

---

**MORINGACEAE**

|                                           |         |                                                     |  |                                |                                             |
|-------------------------------------------|---------|-----------------------------------------------------|--|--------------------------------|---------------------------------------------|
| <i>Moringa oleifera</i> Lam., E,<br>25071 | Moringa | Ornamental                                          |  | Whole plant,<br>by its flowers | Planted in<br>private gardens               |
|                                           |         | Medicinal<br>(digestive<br>system), stomach<br>ache |  | Leaves                         | Milled, boiled,<br>ingestion of<br>infusion |
|                                           |         | Medicinal<br>(endocrni<br>system), diabetes         |  | Leaves                         | Boiled, drink<br>the infusion               |

---

**MYRTACEAE**

|                                                    |           |                                                     |  |                              |                                        |
|----------------------------------------------------|-----------|-----------------------------------------------------|--|------------------------------|----------------------------------------|
| <i>Eucalyptus camaldulensis</i><br>Dehnh.,E, 25018 | Eucalipto | Medicinal<br>(respiratory<br>system),<br>bronchitis |  | Leaves and<br>fruits (dried) | Boiled, as tea<br>mixed with<br>lemon  |
|                                                    |           | Fuel                                                |  | Trunks and<br>branches       | Dry                                    |
| <i>Eucalyptus globulus</i> Labill.,<br>E, 25072    | Eucalipto | Medicinal<br>(respiratory<br>system),<br>bronchitis |  | Leaves and<br>fruits (dried) | Boiled, as tea,<br>mixed with<br>lemon |
|                                                    |           | Fuel                                                |  | Trunks and<br>branches       | Dry                                    |

---

**NYCTAGINACEAE**

|                                                 |            |                                                                                                       |  |                                                                 |                                                          |
|-------------------------------------------------|------------|-------------------------------------------------------------------------------------------------------|--|-----------------------------------------------------------------|----------------------------------------------------------|
| <i>Bougainvillea glabra</i> Choisy,<br>N, 25105 | Bugambilia | Ornamental                                                                                            |  | Whole plants,<br>by its showy<br>and<br>polichromatic<br>bracts | Planted in<br>many places,<br>private and<br>public ones |
|                                                 |            | Medicinal<br>(digestive and<br>respiratory<br>systems),<br>stomach ache and<br>throat<br>inflammation |  | Bracts                                                          | Booiled,<br>ingestion of<br>infusion                     |



|                                      |           |            |                                                                 |                                  |
|--------------------------------------|-----------|------------|-----------------------------------------------------------------|----------------------------------|
| <i>Mirabilis jalapa</i> L., N, 25052 | Maravilla | Ornamental | Whole plant,<br>by its beautiful<br>yellow and<br>large flowers | Cultivated in<br>private gardens |
|--------------------------------------|-----------|------------|-----------------------------------------------------------------|----------------------------------|

---

**OLEACEAE**

|                                               |        |                            |                                                                                        |                                                                |
|-----------------------------------------------|--------|----------------------------|----------------------------------------------------------------------------------------|----------------------------------------------------------------|
| <i>Fraxinus americana</i> L, N,<br>25017      | Fresno | Ornamental                 | Whole plant,<br>by its large<br>size and long<br>leaves                                | Cultivated in<br>private gardens<br>and public<br>parks        |
| <i>Ligustrum japonicum</i> Thunb,<br>E, 25051 | Trueno | Construction<br>Ornamental | Trunks<br>Whole plant,<br>by its<br>perennial<br>leaves and<br>dense<br>inflorescences | Dry<br>Cultivated in<br>private gardens<br>and public<br>parks |
| <i>Olea europea</i> L, E, 25106               | Olivo  | Ornamental                 | Whole plant,<br>by its leaves                                                          | Cultivated in<br>private gardens                               |

---

**PINACEAE**

|                                            |               |                                    |                                                                             |                                                |
|--------------------------------------------|---------------|------------------------------------|-----------------------------------------------------------------------------|------------------------------------------------|
| <i>Pinus cembroides</i> Zucc., N,<br>25049 | Pino piñonero | Ornamental                         | Whole plant,<br>by its aroma,<br>and perennial<br>leaves                    | Cultivated in<br>private gardens               |
| <i>Pinus pinceana</i> Gordon, N,<br>25050  | Pino          | Construction<br>Food<br>Ornamental | Trunks<br>Seeds<br>Whole plant,<br>by its aroma,<br>and perennial<br>leaves | Dry<br>Raw<br>Cultivated in<br>private gardens |
|                                            |               | Construction                       | Trunks                                                                      | Dry                                            |

---

**PLATANACEAE**

|                                              |       |            |                                            |                            |
|----------------------------------------------|-------|------------|--------------------------------------------|----------------------------|
| <i>Platanus occidentalis</i> L., N,<br>25107 | Álamo | Ornamental | Whole plant,<br>by its beautiful<br>leaves | Planted in<br>public parks |
|----------------------------------------------|-------|------------|--------------------------------------------|----------------------------|

---

**POACEAE**

|                                          |         |                                                             |               |                                              |
|------------------------------------------|---------|-------------------------------------------------------------|---------------|----------------------------------------------|
| <i>Arundo donax</i> L., E, 25108         | Carrizo | Construction                                                | Stems         | Dry, household<br>goods                      |
| <i>Avena sativa</i> L., E, 25109         | Avena   | Food<br>Medicinal<br>(digestive<br>system), colic<br>Forage | Seeds<br>Seed | Cook<br>Oatmeal gruel                        |
| <i>Hordeum vulgare</i> L., E, 25048      | Cebada  | Forage                                                      | Whole plant   | Dry, for<br>domestic<br>livestock            |
| <i>Sorghum bicolor</i> (L.) Moench,<br>E | Sorgo   | Forage                                                      | Whole plant   | Dry, for<br>domestic<br>livestock            |
| <i>Zea mays</i> L., N, 25047             | Maíz    | Food                                                        | Seeds         | Cook, to make<br>dough and then<br>tortillas |
|                                          |         | Forage                                                      | Whole plant   | Dry, for                                     |

|  |  |                                                  |        |                                                |
|--|--|--------------------------------------------------|--------|------------------------------------------------|
|  |  | Medicinal (digestive system), to eliminate worms | Styles | domestic livestock<br>Boil, drink the infusion |
|  |  | Medicinal (endocrin system) kidney diseases      | Styles | Boil, drink the infusion                       |

---

**PORTULACACEAE**

|                                        |           |                                                              |        |                                           |
|----------------------------------------|-----------|--------------------------------------------------------------|--------|-------------------------------------------|
| <i>Potrulaca oleracea</i> L., N, 25073 | Verdolaga | Medicinal (circulatory system), to improve blood circulation | Leaves | Raw or boiled, eat and drink the infusion |
|----------------------------------------|-----------|--------------------------------------------------------------|--------|-------------------------------------------|

---

**PTERIDACEAE**

|                                                             |             |            |                                                            |                            |
|-------------------------------------------------------------|-------------|------------|------------------------------------------------------------|----------------------------|
| <i>Adiantum capillus-veneris</i> L., N, 25110               | Culantrillo | Ornamental | Whole plant, by its beautiful leaves                       | Planted in private gardens |
| <i>Argyroschisma limitanea</i> (Maxon) Windham, N, 25074    | Helecho     | Ornamental | Whole plant, by its beautiful leaves, and pubescence color | Planted in private gardens |
| <i>Asplenium exiguum</i> Bedd., N, 25046                    | Helecho     | Ornamental | Whole plant, by its beautiful leaves                       | Planted in private gardens |
| <i>Pleopeltis guttata</i> (Maxon) E.G. Andrews & Windham, N | Helecho     | Ornamental | Whole plant, by its beautiful leaves                       | Planted in private gardens |

---

**RHAMNACEAE**

|                                        |        |            |                            |                                    |
|----------------------------------------|--------|------------|----------------------------|------------------------------------|
| <i>Ziziphus jujuba</i> Mill., E, 25084 | Jujube | Ornamental | Whole plant, by its leaves | Plantd in private properties, rare |
|                                        |        | Food       | Fruit                      | Raw                                |

---

**ROSACEAE**

|                                                      |           |                                     |                                                        |                               |
|------------------------------------------------------|-----------|-------------------------------------|--------------------------------------------------------|-------------------------------|
| <i>Cydonia oblonga</i> Mill., E, 25083               | Membrillo | Food                                | Fruit                                                  | Raw or boiled                 |
|                                                      |           | Ornamental                          | Whole plant, by its beautiful growth                   | Planted in private properties |
|                                                      |           | Medicinal (digestive system), colic | Fruit                                                  | Boild, drink the pulp         |
|                                                      |           | Food                                | Fruit                                                  | preserved fruits (canned)     |
| <i>Eriobotrya japonica</i> (Thunb.) Lindl., E, 24980 | Níspero   | Food                                | Fruit                                                  | Raw                           |
|                                                      |           | Ornamental                          | Whole plant, by tts large size and used as shadow tree | Planted in private properties |
| <i>Prunus armeniaca</i> L., E, 25045                 | Chabacano | Food                                | Fruit                                                  | Raw                           |

|                                             |         |            |                                                          |                               |
|---------------------------------------------|---------|------------|----------------------------------------------------------|-------------------------------|
|                                             |         | Ornamental | Whole plant, by its stem color and texture of its leaves | Planted in private properties |
| <i>Prunus domestica</i> L., E, 25082        | Ciruelo | Food       | Fruit                                                    | Raw                           |
|                                             |         | Ornamental | Whole plant, by its leaves and fruits                    | Planted in private properties |
| <i>Prunus persica</i> (L.) Batsch, E, 25081 | Durazno | Food       | Fruit                                                    | Raw                           |
|                                             |         | Ornamental | Whole plant, by its dense foliage                        | Planted in private properties |
|                                             |         | Food       | Fruit                                                    | Boiled to make jam            |
| <i>Rosa gallica</i> L., E, 25014            | Rosa    | Ornamental | Whole plant, by its showy flowers                        | Planted in private properties |
| <i>Rosa</i> sp., E, 25013                   | Rosa    | Ornamental | Whole plant, by its showy flowers                        | Planted in private properties |

---

#### RUTACEAE

|                                                |         |                                                                             |                                                          |                               |
|------------------------------------------------|---------|-----------------------------------------------------------------------------|----------------------------------------------------------|-------------------------------|
| <i>Citrus limon</i> (L.) Osbeck, E, 24982      | Limón   | Food, hydration                                                             | Fruit                                                    | Raw, limonade                 |
|                                                |         | Ornamental                                                                  | Whole plant, by its persistent foliage and dense foliage | Planted in private properties |
|                                                |         | Medicinal (digestive and respiratory systems), stomach discomfort and cough | Leaves                                                   | Boiled, as tea                |
| <i>Citrus x sinensis</i> (L.) Osbeck, E, 24981 | Naranja | Food                                                                        | Fruit                                                    | Raw                           |
|                                                |         | Medicinal (digestive system), stomach discomfort                            | Leaves                                                   | Boiled, as tea                |
|                                                |         | Ornamental                                                                  | Whole plant, by its persistent foliage and dense foliage | Planted in private properties |
|                                                |         | Medicinal (respiratory system), cough                                       | Leaves                                                   | Boiled, drink the infusion    |

|                                                                   |                      |                                                                               |                                                             |                                                |
|-------------------------------------------------------------------|----------------------|-------------------------------------------------------------------------------|-------------------------------------------------------------|------------------------------------------------|
| <i>Ruta graveolens</i> L., E, 24983                               | Ruda                 | Medicinal<br>(digestive system), colic                                        | Leaves, in warm water for 3 minutes only                    | Boiled, drink infusion                         |
|                                                                   |                      | Condiment                                                                     | Leaves                                                      | Milled, added to the food                      |
|                                                                   |                      | Medicinal<br>(endocrin system)                                                | Whole plant                                                 | Miled, boiled, drink the infusion              |
|                                                                   |                      | Medicinal<br>(digestive system), stomach ache                                 | Branches                                                    | Boiled, drink the infusion                     |
| <b>SALICACEAE</b>                                                 |                      |                                                                               |                                                             |                                                |
| <i>Populus alba</i> L., N, 25015                                  | Álamo                | Ornamental                                                                    | Whole plant, by the color of its levae (white adaxially)    | Planted in private properties and public areas |
| <i>Salix nigra</i> Marshall, N,2 5016                             | Sauce                | Ornamental                                                                    | Whole plant, by its narrow leaves                           | Planted in private properties and public parks |
| <b>SAPINDACEAE</b>                                                |                      |                                                                               |                                                             |                                                |
| <i>Aesculus hippocastanum</i> L., E, 25044                        | Castaño de la Indias | Medicinal<br>(circulatory system) blood circulation                           | Leaves                                                      | Boiled, drink the infusion                     |
|                                                                   |                      | Ornamental                                                                    | Whole plant, by its beatiful leaves                         | Planted in private properties                  |
|                                                                   |                      | Medicinal<br>(circulatory system) improve blood circulation                   | Leaves                                                      | Boiled, drink the infusion                     |
| <b>SAURURACEAE</b>                                                |                      |                                                                               |                                                             |                                                |
| <i>Anemopsis californica</i> (Nutt.) Hook. & Anr., N, 24997       | Hierba del manso     | Medicinal<br>(endocrin system), inflammation of lymph nodes; high temperature | Stems, leaves, inflorescences                               | Raw, milled, eat; boiled drink as tea          |
| <b>SCROPHULARIACEAE</b>                                           |                      |                                                                               |                                                             |                                                |
| <i>Leucophyllum frutescens</i> (Berland.) I.M. Johnston, N, 25075 | Cenizo               | Medicinal<br>(respiratory system), cough                                      | Leaves                                                      | Boil, ingestion of infusion                    |
|                                                                   |                      | Ornamental                                                                    | Whole plant, by its pereennial foliage and abundant flowers | Planted in private properties                  |
|                                                                   |                      | Medicinal<br>(circulatory system), against                                    | Leaves                                                      | Boiled, drink as a tea, several cups at day    |

|                                             |        |                                                     |                     |                                                 |
|---------------------------------------------|--------|-----------------------------------------------------|---------------------|-------------------------------------------------|
|                                             |        | anemia                                              |                     |                                                 |
|                                             |        | Medicinal (integumentary system), dermic infections | Branches and leaves | Toasted, apply as poultice in the affected area |
| <i>Leucophyllum minus</i> A. Gray, N, 25080 | Cenizo | Medicinal (respiratory system), cough               | Leaves              | Boil, ingestion of infusion                     |

---

**SELAGINELLACEAE**

|                                                                  |              |                                        |        |                            |
|------------------------------------------------------------------|--------------|----------------------------------------|--------|----------------------------|
| <i>Selaginella lepidophylla</i> (Hook. & Grev.) Spring, N, 24998 | Flor de peña | Medicinal (digestive system), diarrhea | Leaves | Boiled, drink the infusion |
|------------------------------------------------------------------|--------------|----------------------------------------|--------|----------------------------|

---

**SOLANACEAE**

|                                                |              |                                                     |                     |                                         |
|------------------------------------------------|--------------|-----------------------------------------------------|---------------------|-----------------------------------------|
| <i>Capsicum annuum</i> L., N, 25043            | Chile piquín | Condiment                                           | Fruit               | Raw or raw and milled, boiled with meal |
|                                                |              | Medicinal (Respiratory system), cough               | Fruit               | Boiled, drink the infusion              |
|                                                |              | Medicinal (digestive system), hydration, hangover   | Fruit               | Mixed with meal, spicy food             |
|                                                |              | Medicinal (integumentary system), extrneal wounds   | Fruit               | Boiled, the solution as poultice        |
| <i>Lycopersicon esculentum</i> Mill., N, 25111 | Tomate       | Food                                                | Fruit               | Raw or cook                             |
| <i>Solanum tuberosum</i> L., E, 25079          | Papa         | Food                                                | Root                | Cook                                    |
| <i>Solanum rostratum</i> Dunal, N, 25112       | Mula         | Medicinal (reproductive system), vaginal infections | Branches and leaves | Boiled, drink the infusion              |

---

**TURNERACEAE**

|                                                    |            |                                                           |             |                            |
|----------------------------------------------------|------------|-----------------------------------------------------------|-------------|----------------------------|
| <i>Turnera diffusa</i> Willd. ex Schult., N, 25076 | Oreganillo | Medicinal (endocrine system), physical strenght           | Leaves      | Boiled, drink the infusion |
|                                                    |            | Medicinal (circulatory system), improve blood circulation | Leaves      | Boiled, drink the infusion |
|                                                    |            | Medicinal (endocrin system), menopause                    | Whole plant | Boiled, drink the infusion |

---

**URTICACEAE**

|                                                                  |              |                                                                     |                                     |                                                                                                     |
|------------------------------------------------------------------|--------------|---------------------------------------------------------------------|-------------------------------------|-----------------------------------------------------------------------------------------------------|
| <i>Urtica chamaedryoides</i> Pursh, N, 25077                     | Ortiga       | Medicinal (lymphatic system), blood infections                      | Leaves and stems                    | Boiled, drink the infusion                                                                          |
| <b>VERBENACEAE</b>                                               |              |                                                                     |                                     |                                                                                                     |
| <i>Lippia graveolens</i> Kunth, N, 25042                         | Orégano      | Condiment                                                           | Leaves, flowers, and inflorescences | Dry, milled, add to the food                                                                        |
|                                                                  |              | Medicinal (respiratory system), eliminate phlegm                    | Leaves                              | Boiled, drink the infusion                                                                          |
| <b>VITACEAE</b>                                                  |              |                                                                     |                                     |                                                                                                     |
| <i>Vitis vinifera</i> L., E, 25078                               | Uva          | Wine industry                                                       | Fruit                               | Smash, to produce wine                                                                              |
|                                                                  |              | Food                                                                | Fruit                               | Boiled to make jam                                                                                  |
| <b>XANTHORRHOEACEAE</b>                                          |              |                                                                     |                                     |                                                                                                     |
| <i>Aloe vera</i> L., E, 25041                                    | Aloe, sábila | Medicinal (integumentary system), skin burns, epidermical wounds    | Pulp                                | Raw, as poultice in the affected area                                                               |
|                                                                  |              | Medicinal (digestive system), ulcer                                 | Sap                                 | Raw, drink                                                                                          |
|                                                                  |              | Medicinal (integumentary system), scar                              | Leaves (pulp)                       | Raw, apply directly on the affected area                                                            |
|                                                                  |              | Food                                                                | Leaves (pulp)                       | Milled, mixed with water, refreshing drink                                                          |
| <b>ZYGOPHYLLACEAE</b>                                            |              |                                                                     |                                     |                                                                                                     |
| <i>Larrea tridentata</i> (Sessé & Moc. ex DC.) Coville, N, 24999 | Gobernadora  | Medicinal (endocrine system), kidney diseases, remove kidney stones | Leaves                              | Boiled, put 5-6 leaves in a liter of boiling water for 20 seconds (it is very strong), drink as tea |
|                                                                  |              | Medicinal (integumentary system), bad smell of feet                 | Leaves                              | Boiled, as poultice on the whole foot, also, put some dry leaves inside the shoes                   |
|                                                                  |              | Medicinal (integumentary system), fungi on the feet                 | Branches                            | Boiled, apply as a poultice                                                                         |
|                                                                  |              | Medicinal                                                           | Branches                            | Boiled, apply                                                                                       |

|                            |                  |                                                    |                                                 |          |                                                   |
|----------------------------|------------------|----------------------------------------------------|-------------------------------------------------|----------|---------------------------------------------------|
|                            |                  | (integumentary system), strengthen the hair        | Craft,                                          | Branches | as shampoo directly on the hair                   |
|                            |                  | Furniture                                          |                                                 | Branches | Boiled, the solution used as tincture for saddles |
|                            |                  | Medicinal (digestive system), to whet the appetite |                                                 | Leaves   | To make chairs                                    |
|                            |                  | Medicinal (integumentary system), external wounds  |                                                 | Leaves   | Boiled, 4-6 leaves in water, strong drink         |
| <hr/>                      |                  |                                                    |                                                 |          |                                                   |
| <b>ZYNGIBERACEAE</b>       |                  |                                                    |                                                 |          |                                                   |
| <i>Zingiber officinale</i> | Roscoe, E, 24984 | Genjibre                                           | Medicinal (endocrine system), physical weakness | Root     | Boiled, drink the infusion                        |
| <hr/>                      |                  |                                                    |                                                 |          |                                                   |
